# Supplementary material for: Effects of tadalafil once daily or on demand versus placebo on time to recovery of erectile function in patients after bilateral nerve-sparing radical prostatectomy
Source: PubMed Central journal article supplement (PMC4480825; doi:10.1007/s00345-014-1377-3), 2014-08-26
Supplement: 345_2014_1377_MOESM1_ESM.pdf [file 345_2014_1377_MOESM1_ESM.pdf]

**Electronic Supplementary Material:****World Journal of Urology****Effects of Tadalafil Once Daily or On-Demand versus Placebo on Time to Recovery of Erectile Function in Patients after Bilateral Nerve-Sparing Radical Prostatectomy**

**Authors:** Ignacio Moncada, Fermín R. de Bethencourt, Enrique Lledó-García, Javier Romero-Otero, Carmen Turbi, Hartwig Büttner, Carsten Henneges, Juan I. Martinez Salamanca

Corresponding author: Ignacio Moncada, Department of Urology, Hospital La Zarzuela Madrid, Spain. E-mail: [ignacio@moncada.name](mailto:ignacio@moncada.name)

Supplementary Figure S1: Trial design

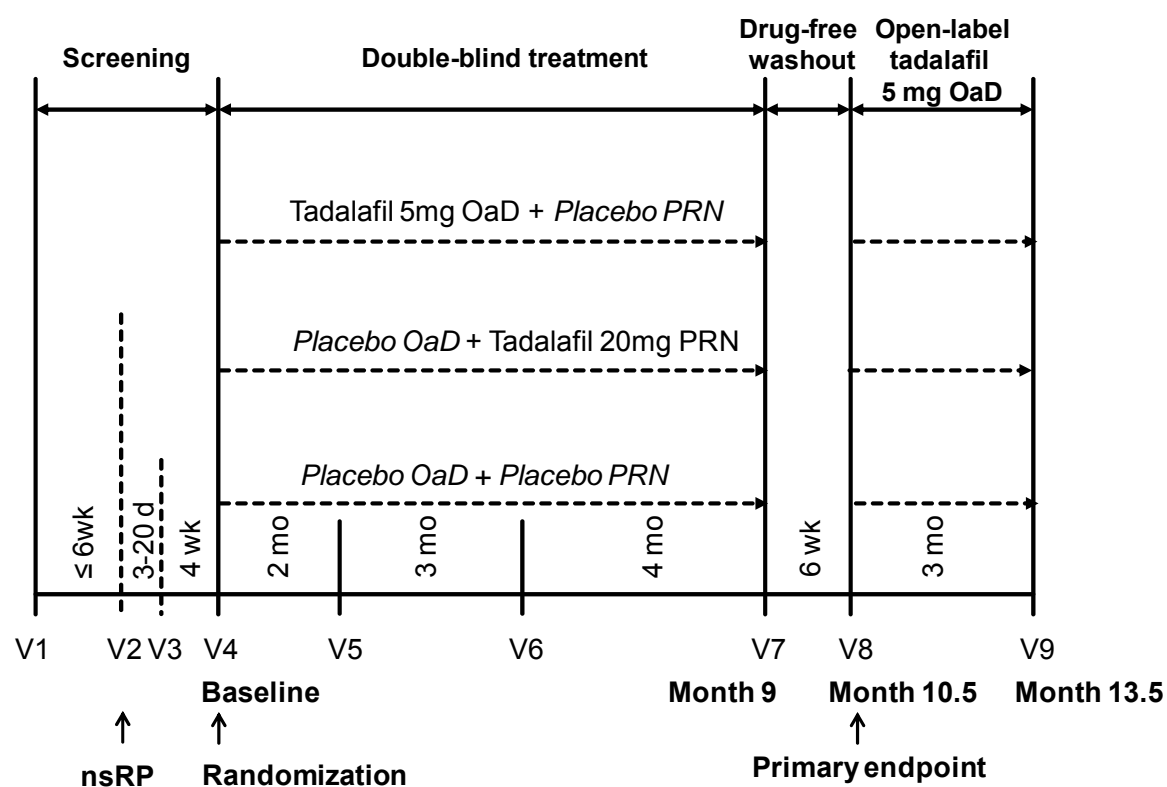

Abbreviations: nsRP, bilateral nerve-sparing radical prostatectomy; d, day; mo, month; OaD, once a day; PRN, “pro-re-nata”/on-demand; V, visit; wk, week.

Previously published in: Montorsi et al. 2014 [15].

Supplementary Figure S2 Patient Disposition

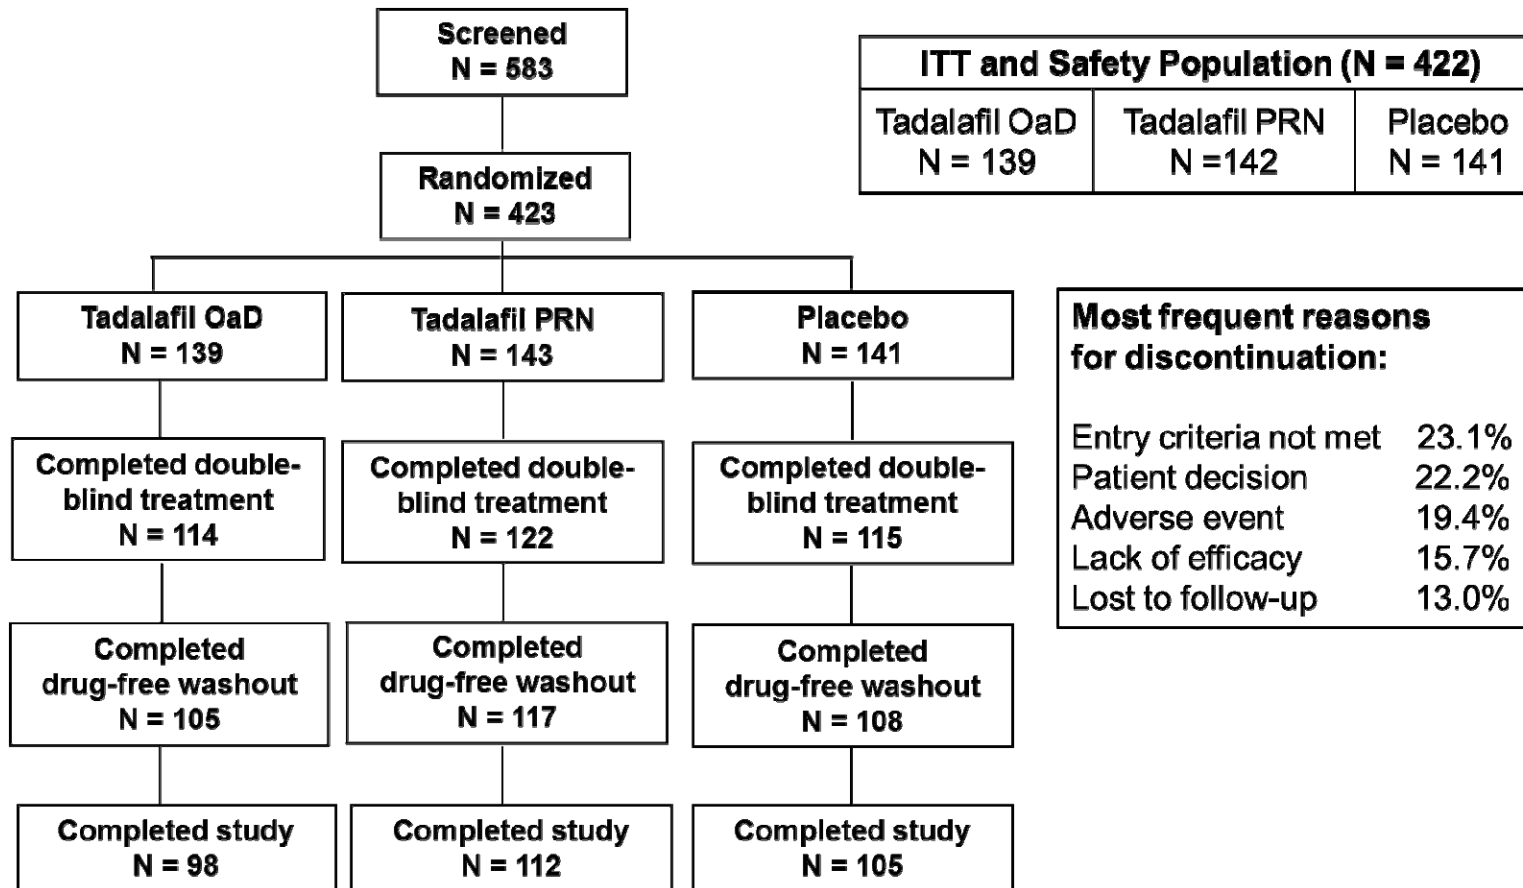

Abbreviations: ITT, intention-to-treat; OaD, once a day; PRN, “pro-re-nata”/on-demand; N, number of patients.

Previously published in: Montorsi et al. 2014 [15].

**Supplementary Figure S3 Percent Patients Achieving IIEF-EF Score  $\geq 22$**

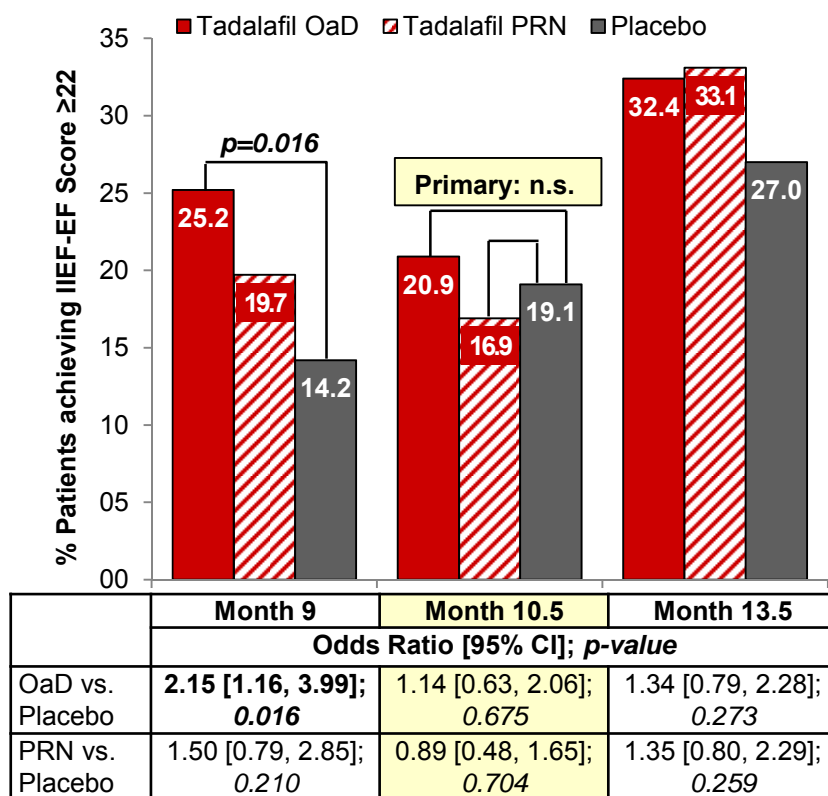

Abbreviations: CI, confidence interval; IIEF-EF, International Index of Erectile Function-Erectile Function domain score; n.s., not significant; OaD, once a day; PRN, “pro-re-nata”/on-demand.

Previously published in: Montorsi et al. 2014 [15].

**Supplementary Figure S4** Cox Proportional Hazard Model on Time to EF-Recovery (IIEF-EF $\geq$ 22) during DBT

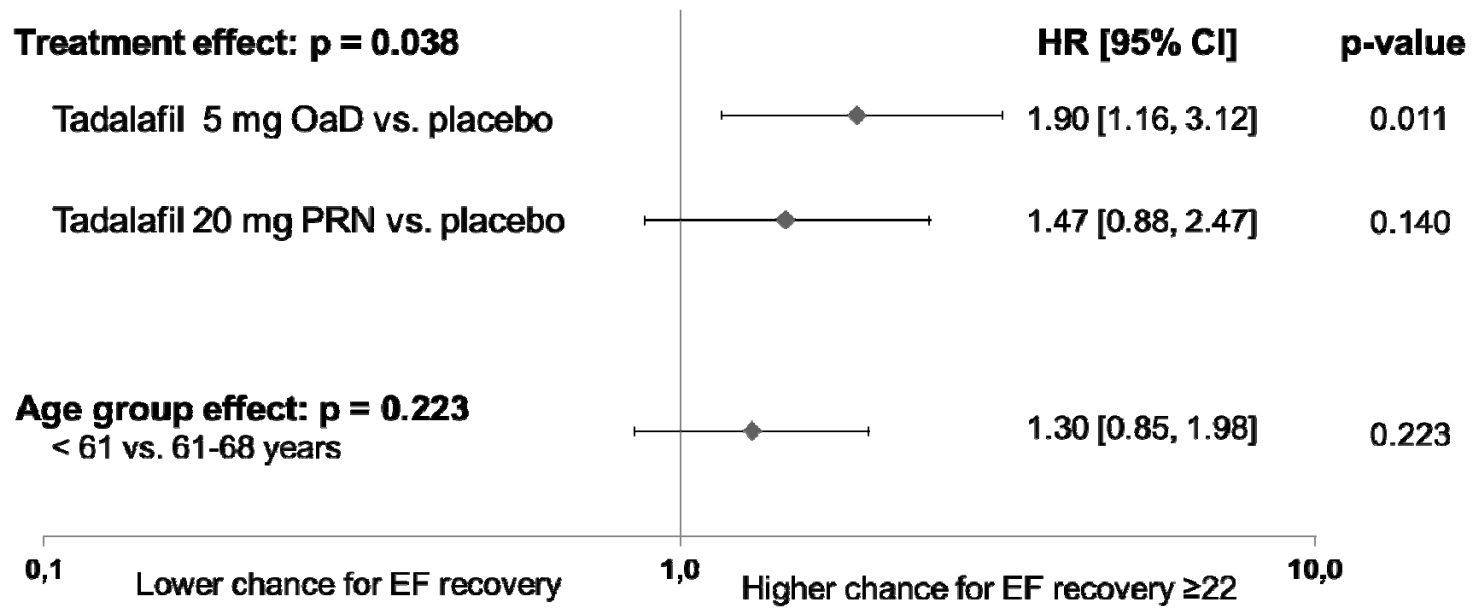

Abbreviations: CI, confidence interval; DBT, double-blind treatment; EF, erectile function; HR, hazard ratio; IIEF-EF, International Index of Erectile Function-Erectile Function domain score; OaD, once a day; PRN, “pro-re-nata”/on-demand.
